# Supplementary material for: (Co,Mn)3O4-doped carbon nanotube composite as a bifunctional electrocatalyst for aluminum–air batteries
Source: Royal Society of Chemistry journal article supplement (doi:10.1039/d3nj05117j), 2023-12-20
Supplement: d3nj05117j1.pdf [file d3nj05117j1.pdf]

## Supplementary material

### (Co,Mn)<sub>3</sub>O<sub>4</sub> Doping Carbon Nanotubes Composite as

### Bifunctional Electrocatalyst for Aluminum-air Battery

Xi Wang<sup>a</sup>, Zhao Li<sup>b</sup>, Lei Liu<sup>a</sup>, Jiuqing Hu<sup>a</sup>, Haobo Shen<sup>a</sup>, Rongrong Li<sup>c</sup>, Zhiqiang Geng<sup>d</sup>, Zunlong Jin<sup>a,\*</sup>, Changliang Wang<sup>a,\*</sup>

<sup>a</sup> School of Mechanical and Power Engineering, Zhengzhou University, Zhengzhou 450001, China

<sup>b</sup> Henan Boiler and Pressure Vessel Inspection Technology Research Institute, Zhengzhou 450001, China

<sup>c</sup> Henan Provincial Key Laboratory for Metal Fuel Battery, Zhengzhou Foguang Power Generation Equipment Co., Ltd, Zhengzhou 450001, China

<sup>d</sup> College of Information Science and Technology, Beijing University of Chemical Technology, Beijing 100029, China

\*Corresponding authors.

E-mail address: [zljjin@zzu.edu.cn](mailto:zljjin@zzu.edu.cn) (Z. Jin), [clwang@zzu.edu.cn](mailto:clwang@zzu.edu.cn) (C. Wang).

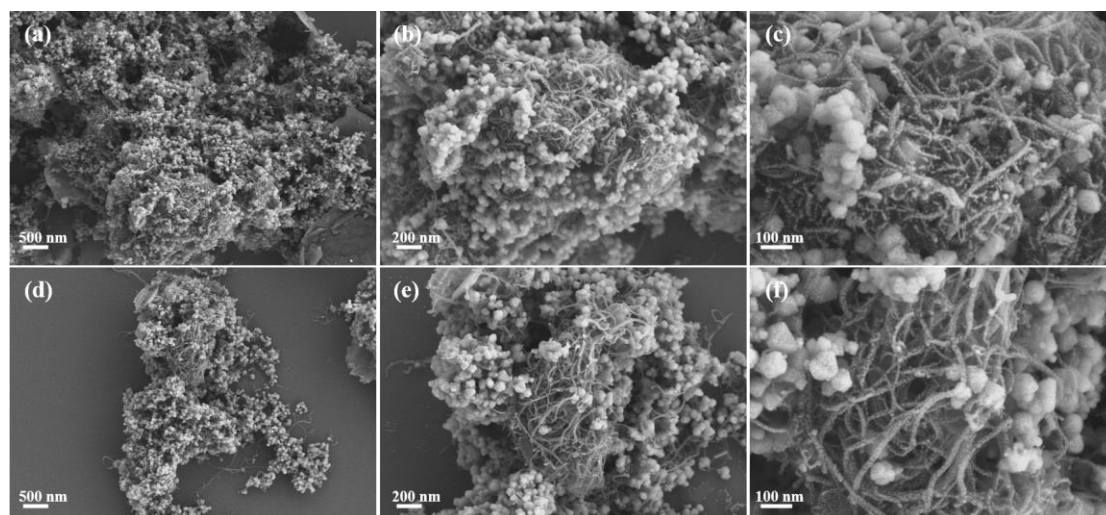

**Fig. S1.** SEM images of (a-c) Co<sub>3</sub>O<sub>4</sub>/NG, and (d-f) Mn<sub>3</sub>O<sub>4</sub>/NG.

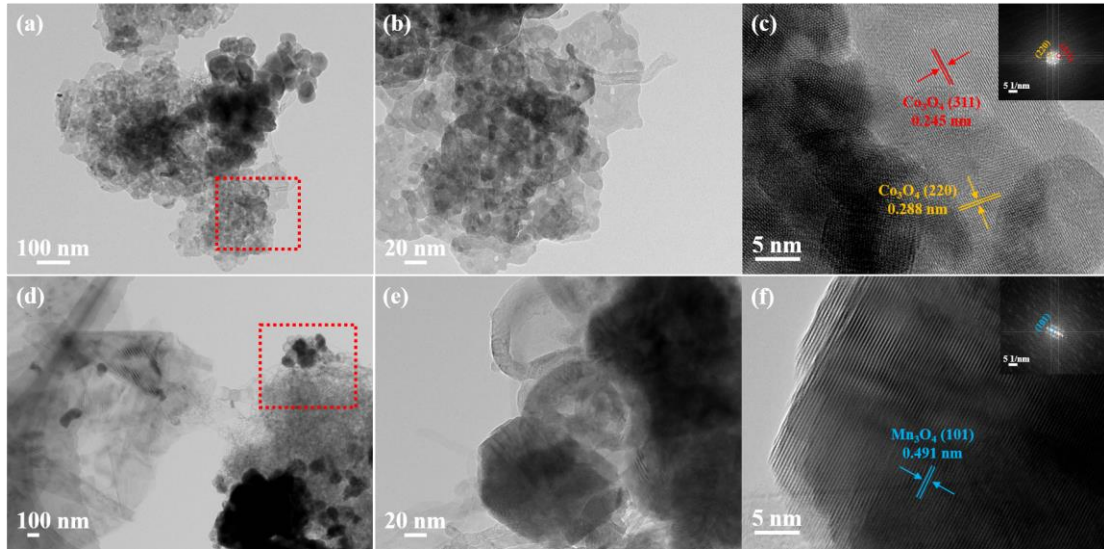

**Fig. S2.** TEM and HRTEM images (the inset is corresponding FFT pattern) of (a-c)  $\text{Co}_3\text{O}_4/\text{NG}$  and (d-f)  $\text{Mn}_3\text{O}_4/\text{NG}$  sample.

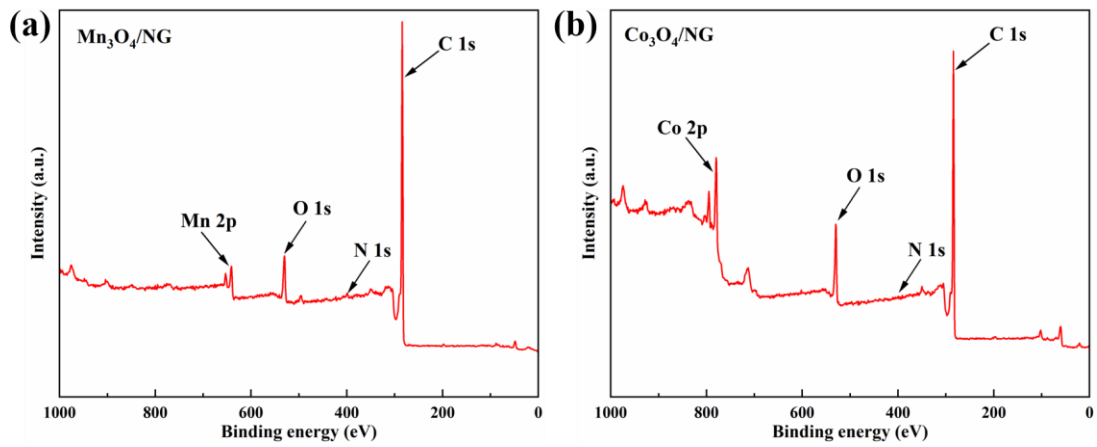

**Fig. S3.** XPS survey spectrums of (a)  $\text{Co}_3\text{O}_4/\text{NG}$  and (b)  $\text{Mn}_3\text{O}_4/\text{NG}$ .

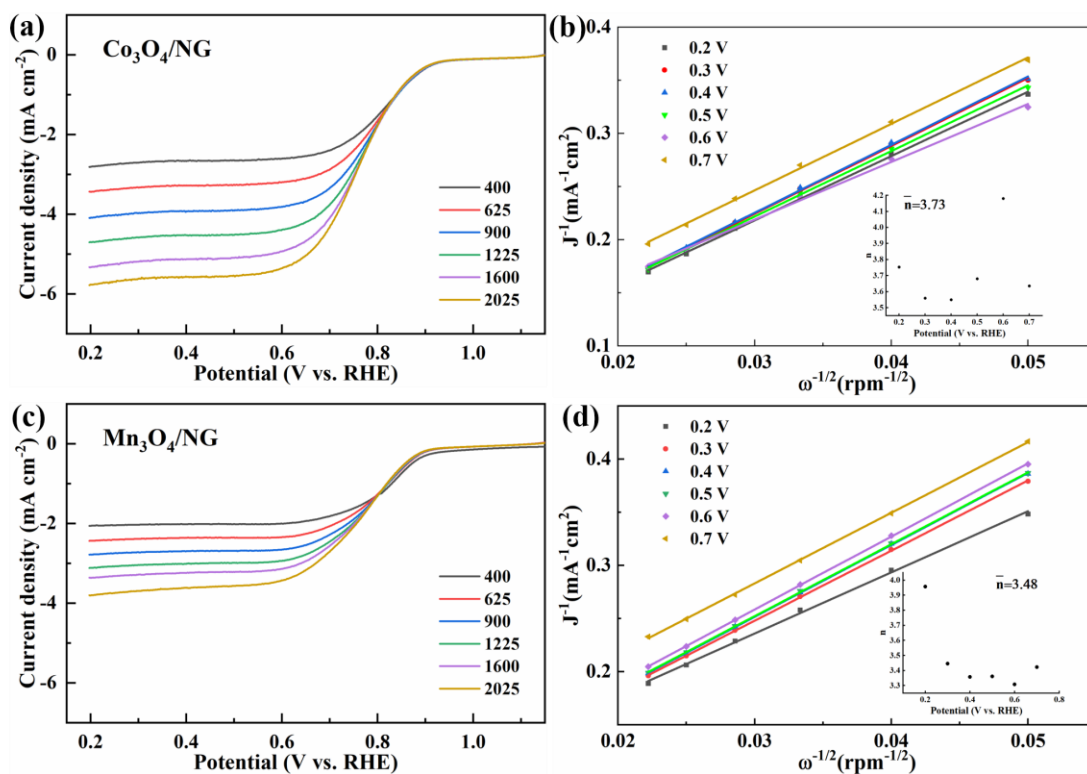

**Fig. S4.** (a) ORR LSV curves of  $\text{Co}_3\text{O}_4/\text{NG}$  at different rotating rates and (b) corresponding K-L plots and electron transfer numbers at different potentials, (c) ORR LSV curves of  $\text{Mn}_3\text{O}_4/\text{NG}$  at different rotating rates, and (d) corresponding K-L plots and electron transfer numbers at different potentials.

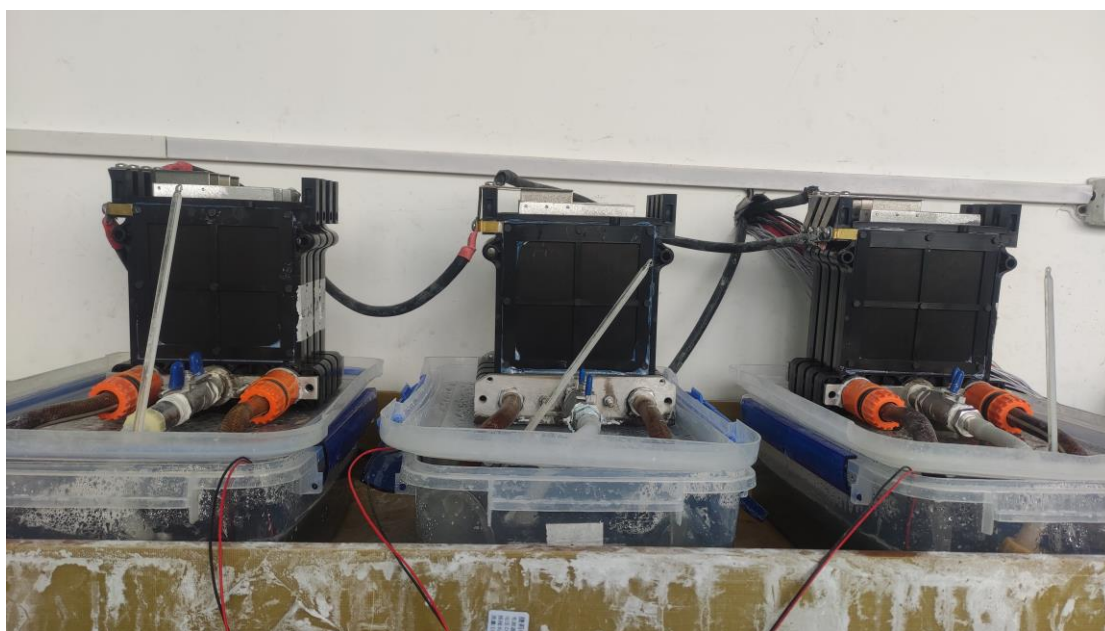

**Fig. S5.** Image of 200 W Al-air batteries stack in series.

**Table S1.** The detailed electrochemical parameters from various catalysts.

| Catalyst                                | ORR                                 |                                   |                                                 |                                 |                                   | OER                                 |                            |                                     |                            |
|-----------------------------------------|-------------------------------------|-----------------------------------|-------------------------------------------------|---------------------------------|-----------------------------------|-------------------------------------|----------------------------|-------------------------------------|----------------------------|
|                                         | Cathodic peak potential (V vs. RHE) | Anodic peak potential (V vs. RHE) | Limiting current density (mA cm <sup>-2</sup> ) | Half-wave potential (V vs. RHE) | Average electron transfer numbers | Tafel slope (mV dec <sup>-1</sup> ) | E <sub>j</sub> (V vs. RHE) | Tafel slope (mV dec <sup>-1</sup> ) | Current retention rate (%) |
| Pt/C                                    | 0.78                                | 0.99                              | 5.529                                           | 0.839                           | -                                 | 87.17                               | 1.90                       | 291.45                              | 70.84                      |
| NG                                      | 0.67                                | 1.03                              | 3.670                                           | 0.764                           | -                                 | -                                   | -                          | -                                   | -                          |
| Co <sub>3</sub> O <sub>4</sub> /NG      | 0.84                                | 1.02                              | 5.329                                           | 0.765                           | 3.77                              | 92.49                               | 1.75                       | 120.34                              | 81.33                      |
| Mn <sub>3</sub> O <sub>4</sub> /NG      | 0.71                                | -                                 | 3.364                                           | 0.776                           | 3.48                              | 113.09                              | 1.84                       | 202.03                              | 89.58                      |
| (Co,Mn) <sub>3</sub> O <sub>4</sub> /NG | 0.83                                | 1.03                              | 5.361                                           | 0.831                           | 3.99                              | 84.53                               | 1.72                       | 112.51                              | 93.53                      |

**Table S2.** Comparison of Co, Mn oxides electrocatalysts performance for ORR and OER.

| Catalyst                                                                   | Limiting current density<br>(mA cm <sup>-2</sup> ) | Half-wave potential<br>(V vs. RHE) | Average electron<br>transfer numbers | E <sub>j</sub> @10 mA cm <sup>-2</sup><br>(V vs. RHE) | Ref.      |
|----------------------------------------------------------------------------|----------------------------------------------------|------------------------------------|--------------------------------------|-------------------------------------------------------|-----------|
| (Co,Mn) <sub>3</sub> O <sub>4</sub> /NG                                    | 5.361                                              | 0.831                              | 3.99                                 | 1.72                                                  | This work |
| Co <sub>3</sub> O <sub>4</sub> /Mn <sub>3</sub> O <sub>4</sub> /CNFs       | 6.96                                               | 0.85                               | 3.96                                 | 1.63                                                  | S1        |
| Co <sub>3</sub> O <sub>4</sub> /Mn <sub>3</sub> O <sub>4</sub> (2:1)/N-rGO | -                                                  | 0.86                               | 3.85                                 | 1.59                                                  | S2        |
| Mn <sub>3</sub> O <sub>4</sub> /O-CNTs                                     | 3.26                                               | 0.85                               | 3.95                                 | 1.64                                                  | S3        |
| Co <sub>3</sub> O <sub>4</sub> /Co <sub>2</sub> MnO <sub>4</sub>           | 5.17                                               | 1.09                               | 3.80                                 | 1.77                                                  | S4        |
| Mn <sub>0.25</sub> -Co <sub>3</sub> O <sub>4</sub> /CNTs                   | 6.17                                               | 0.75                               | 3.84                                 | 1.76                                                  | S5        |
| Mn <sub>1.8</sub> Co <sub>0.2</sub> (OH) <sub>3</sub> VO <sub>3</sub>      | 5.50                                               | 0.785                              | -                                    | 1.74                                                  | S6        |
| Mn/Co-N-C-0.02-800                                                         | 5.30                                               | 0.80                               | 4.00                                 | 1.66                                                  | S7        |
| Co/Zn/Mn@NC-800                                                            | ~5.50                                              | 0.86                               | 3.65                                 | 1.59                                                  | S8        |
| Mn/Co-450/ZIF-67                                                           | 7.04                                               | 0.78                               | 4.00                                 | 1.61                                                  | S9        |
| MnO-Co@N-doped carbon                                                      | 4.64                                               | 0.82                               | 4.08                                 | 1.59                                                  | S10       |

### References

- [S1] L. Li, L. Fu, R. Wang, J. Sun, X. Li, C. Fu, L. Fang, W. Zhang, *Electrochim. Acta* 344 (2020) 136145.
- [S2] Q. Huang, X. Zhong, Q. Zhang, X. Wu, M. Jiao, B. Chen, J. Sheng, G. Zhou, *J. Energy Chem.* 68 (2022) 679-687.
- [S3] L. Li, J. Yang, H. Yang, L. Zhang, J. Shao, W. Huang, B. Liu, X. Dong, *ACS Appl. Energy Mater.* 1 (2018) 963-969.
- [S4] D. Wang, X. Chen, D.G. Evans, W. Yang, *Nanoscale* 5 (2013) 5312-5315.
- [S5] S. Li, Z. Xia, W. Zhao, K. Wu, L. Suo, Y. Huo, L. Li, *Ionics* 27 (2021) 1619-1632.
- [S6] X. Zheng, X. Cao, Y. Zhang, K. Zeng, L. Chen, R. Yang, *J. Colloid Interface Sci.* 628 (2022) 922-930.
- [S7] L. Wei, L. Qiu, Y. Liu, J. Zhang, D. Yuan, L. Wang, *ACS Sustainable Chem. Eng.* 7 (2019) 14180-14188.
- [S8] S. Chen, H. Ren, Y. Qiu, C. Luo, Q. Zhao, W. Yang, *J. Power Sources* 573 (2023) 233116.

[S9] C. Huang, Y. Zhang, X. Li, H. Cao, Y. Guo, C. Zhang, *Appl. Catal. B* 319 (2022) 121909.

[S10] L. Peng, X. Peng, Z. Zhu, Q. Xu, K. Luo, Z. Ni, D. Yuan, *Int. J. Hydrogen Energy* 48 (2023) 19126-19136.
